# Supplementary material for: Microbiota of maize kernels as influenced by Aspergillus flavus infection in susceptible and resistant inbreds
Source: Front Microbiol. 2023 Nov 6;14:1291284. doi: 10.3389/fmicb.2023.1291284 (PMC10657875; doi:10.3389/fmicb.2023.1291284)
Supplement: Supplementary file 3 [file Table_3.XLSX]

## Sheet: Sheet1
Table 3S. Genera of bacteria identified in this study and their published agricultural impacts
Pantoea		P. agglomerans is effective against pathogenic Penicillium spp., R. stolonifer, and B. cinerea	Nunes et al., 2001; Teixido et al., 2001; Nunes et al., 2002
Klebsiella		K. pneumoniae is effective against Tomato Bacterial Wilt (R. solanacearum); other spp. are beneficial to corn plants	Mowafy et al., 2021; Kim et al., 2022; Li et al., 2023
Enterobacter		Enterobacter spp. mitigate drought stress and enhances growth in maize; topical application results in mitigation of Fusarium spp.	Hinton and Bacon, 1995; Naveed et al., 2014; Mowafy et al., 2021
Comamonas		Comamonas spp. are opportunistic pathogens in humans; found in range of environemts, including soil	Ryan et al., 2022
Burkholderia		B. cepacia responsible for onion root rot disease. Other species promote maize plant growth through IAA production, including root length, seedling height and seedling biomass.	Burkholder, 1950; Naveed et al., 2014; dos Santos et al., 2022
Serratia		Serratia spp. endophytic with plant growth-promoting potential and act as biocontrol agents against saprophytic fungi	Hallman et al., 1997; Müller and Berg, 2008; Khan et al., 2017
Stenotrophomonas		S. maltophilia is a copper-tolerant bacterium that promotes peanut plant growth and protects against N2 starvation; enhances plant growth and biomass in maize	Alexander et al., 2019; Gopi et al., 2020
Lactococcus		Lactococcus spp. production of lactic acid shows antifungal activity agains Fusarium spp. and Aspergillus flavus	Kharazian et al., 2017; Muhialdin et al., 2020
Sphingobacterium		Sphingobacterium spp. have growth-promoting potential for multiple crops	Mehnaz et al., 2007; Ahmed et al., 2014
Achromobacter		Achromobacter spp. are probiotic bacteria in rhizosphere, shown to promote salt tolerance in Arabidopsis thaliana	Jiménez-Vázquez et al., 2020
Listeria		Listeria spp. are often sources of human infection	Rodriguez et al., 2021
Allorhizobium		Allorhizobium spp. induce nodule formation on roots, faciltiating N2 fixation; also includes pathogenic species (A. vitis) that causes grapvine crown gall disease	de Lajudie et al., 1998; Kawaguchi, 2022
Ochrobactrum		Ocrhobactrum spp. effective against pathogenic Fusarium tricinctum, Pestalotiopsis theae, Exobasidium vexans	Sowndhararajan, 2013; Li et al., 2021
Enterococcus		Volatile compounds produced by E. faecium and E. casseliflavus inhibit F. verticillioides and fumonisin production	Gergolet Diaz et al., 2021
Ahmed, I., Ehsan, M., Sin, Y. 2014. Sphingobacterium pakistanensis sp. nov., a novel plant growth promoting rhizobacteria isolated from rhizosphere of Vigna mungo. Antonie van Leeuwenhoek 105, 325-333; doi: 10.1007/s10482-013-0077-0
Alexander, A., Singh, V.K., Mishra, A., Jha, B. 2019. Plant growth promoting rhizobacterium Stenotrophomonas maltophilia BJ01 augments endurance against N2 starvation by modulating physiology and biochemical activities of Arachis hypogea. PLoS One 14: e0222405; doi: 10.1371/journal.pone.0222405
Muhialdin, B.J., Algboory, H.L., Kadum, H., Mohammed, N.K., Saari, N., Hassan, Z., Hussin, A.S.M. 2020. Antifungal activity determination for the peptides generated by Lactobacillus plantarum TE10 against Aspergillus flavus in maize seeds. Food Control 109: e106898; doi: 10.1016/j.foodcont.2019.106898
Burkholder, W.H. 1950. Sour skin, a bacterial rot of onion bulbs. Phytopathology 40: 115-117
de Lajudie, P., Laurent-Fulele, E., Willems, A., Torek, U., Coopman, R., Collins, M.D., Kersters, K., Dreyfus, B., Gillis, M. 1998. Allorhizobium undicola gen. nov., sp. nov., nitrogen-fixing bacteria that efficiently nodulate Neptunia natans in Senegal. International Journal of Systematic and Evolutionary Microbiology 48: 1277-1290; doi: 10.1099/00207713-48-4-1277
dos Santos, I.B., Pereira, A.P.D.A., de Souza, A.J., Cardoso, E.J.B.N., da Silva, F.G., Oliveira, J.T.C., Verdi, M.C.Q., Sobral, J.K. 2022. Selection and characterization of Burkholderia spp. for their plant-growth promoting effects and influence on maize seed germination. Frontiers in Soil Science 1: e805094; doi: 10.3389/fsoil.2021.805094
Gergolet Diaz, D.G., Pizzolitto, R.P., Vázquez, C., Usseglio V.L., Zunino M. P., Dambolena, J. S., Zygadlo, J.A., Merlo, C. 2021. Effects of the volatile organic compounds produced by Enterococcus spp. strains isolated from maize grain silos on Fusarium verticillioides growth and fumonisin B1 production. Journal of Stored Products Research 93: e101825; doi: 10.1016/j.jspr.2021.101825
Gopi K., Jinal H.N., Prittesh P., Kartik V.P., Amaresan N. 2020. Effect of copper-resistant Stenotrophomonas maltophilia on maize (Zea mays) growth, physiological properties, and copper accumulation: potential for phytoremediation into biofortification. International Journal of Phytoremediation 22: 662-668; doi: 10.1080/15226514.2019.1707161
Hallmann J., Quadt-Hallmann A., Mahaffee W.F., Kloepper J.W. 1997. Bacterial endophytes in agricultural crops. Canadian Journal of Microbiology 43: 895-914; doi: 10.1139/m97-131
Hinton D.M., Bacon C.W. 1995. Enterobacter cloacae is an endophytic symbiont of corn. Mycopathologia 129: 117-125; doi: 10.1007/BF01103471
Jiménez-Vázquez, K.R., García-Cárdenas, E., Barrera-Ortiz, S., Ortiz-Castro, R., Ruiz-Herrera, L.F., Ramos-Acosta, B.P., Coria-Arellano, J.L., Sáenz-Mata, J., López-Bucio, J. 2020. The plant beneficial rhizobacterium Achromobacter sp. 5B1 influences root development through auxin signaling and redistribution. Plant Journal 103: 1639-1654; doi: 10.1111/tpj.14853
Kawaguchi, A. 2022. Biocontrol of grapevine crown gall performed using Allorhizobium vitis strain ARK-1. Applied Microbiology 2: 981-991; doi: 10.3390/applmicrobiol2040075
Khan A.R., Park G.S., Asaf S., Hong S.J., Jung B.K., Shin J.H. 2017. Complete genome analysis of Serratia marcescens RSC-14: A plant growth-promoting bacterium that alleviates cadmium stress in host plants. PLoS One 12: e0171534; doi: 10.1371/journal.pone.0171534
Kharazian, Z.A., Jouzani, G.S., Aghdasi, M., Khorvash, M., Zamani, M., Mohammadzadeh, H. 2017. Biocontrol potential of Lactobacillus strains isolated from corn silages against some plant pathogenic fungi. Biological Control 110: 33-43; doi: 10.1016/j.biocontrol.2017.04.004
Kim, B., Park, A.R., Song, C.W., Song, H., Kim, J.C. 2022. Biological control efficacy and action mechanism of Klebsiella pneumoniae JCK-2201 producing meso-2,3-butanediol against tomato bacterial wilt. Frontiers in Microbiology 13: e914589; doi: 10.3389/fmicb.2022.914589
Li, B., Zheng, Y., Cai, Y., Liu, J., Wang, R., Cui, G., Li, Y., Meng, L. 2021. Identification and assessment of a biocontrol agent, Ochrobactrum intermedium I-5, for management of alfalfa root rot caused by Fusarium tricinctum. Phytopathology 111: 1927-1934; doi: 10.1094/PHYTO-12-20-0549-R
Li, X., He, P., He, P., Li, Y., Wu, Y., Mu, C., Munir, S., He, Y. 2023. Native endophytes from maize as potential biocontrol agents against bacterial top rot caused by cross-kingdom pathogen Klebsiella pneumoniae. Biological Control 178: e105131; doi: 10.1016/j.biocontrol.2022.105131
Mehnaz, S., Weselowski, B., Lazarovits, G. 2007. Sphingobacterium canadense sp. nov., an isolate from corn roots. Systematic and Applied Microbiology 30: 519-524; doi: 10.1016/j.syapm.2007.06.002
Mowafy, A.M., Fawzy, M. M., Gebreil, A., Elsayed, A. 2021. Endophytic Bacillus, Enterobacter, and Klebsiella enhance the growth and yield of maize. Acta Agriculturae Scandinavica, Section B - Soil & Plant Science 71: 237-246; doi: 10.1080/09064710.2021.1880621
Muhialdin, B.J., Algboory, H.L., Kadum, H., Mohammed, N.K., Saari, N., Hassan, Z., Hussin, A.S.M. 2020. Antifungal activity determination for the peptides generated by Lactobacillus plantarum TE10 against Aspergillus flavus in maize seeds. Food Control 109: 106898; doi: 10.1016/j.foodcont.2019.106898
Müller, H., Berg, G. 2008. Impact of formulation procedures on the effect of the biocontrol agent Serratia plymuthica HRO-C48 on Verticillium wilt in oilseed rape. BioControl 53: 905-916; doi: 10.1007/s10526-007-9111-3
Naveed, M., Mitter, B., Reichenauer, T.G., Wieczorek, K., Sessitsch, A. 2014. Increased drought stress resilience of maize through endophytic colonization by Burkholderia phytofirmans PsJN and Enterobacter sp. FD17. Environmental and Experimental Botany 97: 30-39; doi: 10.1016/j.envexpbot.2013.09.014
Nunes, C., Usall, J., Teixidó, N., Viñas, I. 2001. Biological control of postharvest pear diseases using bacterium, Pantoea agglomerans CPA-2. International Journal of Food Microbiology 70: 53-61; doi: 10.1016/S0168-1605(01)00523-2
Nunes, C., Usall, J., Teixidó, N., Fons, E., Viñas, I. 2002. Post-harvest biological control by Pantoea agglomerans (CPA-2) on Golden Delicious apples. Journal of Applied Microbiology 92: 247-255; doi: 10.1046/j.1365-2672.2002.01524.x
Rodriguez, C., Taminiau, B., García-Fuentes, E., Daube, G., Korsak, N. 2021. Listeria monocytogenes dissemination in farming and primary production: sources, shedding and control measures. Food Control 120: e107540; doi: 10.1016/j.foodcont.2020.107540
Ryan, M.P., Sevjahova, L., Gorman, R., White, S. 2022. The emergence of the genus Comamonas as important opportunistic pathogens. Pathogens 11: e1032; doi: 10.3390/pathogens11091032
Sowndhararajan, K. 2013. Biocontrol potential of phylloplane bacterium Ochrobactrum anthropi BMO‐111 against blister blight disease of tea. Journal of Applied Microbiology 114: 209-218; doi: 10.1111/jam.12026
Teixidó, N., Usall, J., Palou, L., Asensio, A., Nunes, C., Viñas, I. 2001. Improving control of green and blue molds of oranges by combining Pantoea agglomerans (CPA-2) and sodium bicarbonate. European Journal of Plant Pathology 107: 685-694; doi: 10.1023/A:1011962121067
